# Supplementary material
Source: publisher figshare collection journal article supplement (https://acs.figshare.com/ndownloader/files/21738690)
Supplement: Supplementary file 1 [file 21738690]

## Supporting Information

# ThMnP<sub>n</sub>N (P<sub>n</sub> = P, As): Synthesis, Structure, and Chemical Pressure Effects.

*Fuxiang Zhang,<sup>†</sup> Baizhuo Li,<sup>‡</sup> Qingyong Ren,<sup>#</sup> Huican Mao,<sup>¶</sup> <sup>ℒ</sup> Yuanhua Xia,<sup>Ⓐ</sup>  
Bingfeng Hu,<sup>Ⓐ</sup> Zichen Liu,<sup>†</sup> Zhicheng Wang,<sup>‡</sup> Yeting Shao,<sup>‡</sup> Zhifa Feng,<sup>†</sup> Shugang Tan,<sup>†</sup>  
Yuping Sun,<sup>†</sup> Qiang Jing,<sup>†</sup> Zhi Ren,<sup>§</sup> Bo Liu,<sup>†</sup> Huiqian Luo,<sup>ℒ</sup> Jie Ma,<sup>#</sup> Yuxue Mei,<sup>\*,†</sup> Cao  
Wang,<sup>\*,†</sup> and Guang-Han Cao,<sup>‡</sup>*

<sup>†</sup> School of Physics & Optoelectronic Engineering, Shandong University of Technology, Zibo 255000, P. R. China.

<sup>‡</sup> Department of Physics, Zhejiang University, Hangzhou 310027, P. R. China.

<sup>§</sup> Institute for Natural Sciences, Westlake Institute for Advanced Study, Hangzhou 310027, P. R. China

<sup>#</sup> School of Physics and Astronomy, Shanghai Jiao Tong University, Shanghai 200240, P. R. China.

<sup>¶</sup> Department of Physics and Center for Advanced Quantum Studies, Beijing Normal University, Beijing 100875, P. R. China.

<sup>ℒ</sup> Beijing National Laboratory for Condensed Matter Physics, Institute of Physics, Chinese Academy of Sciences, Beijing 100190, P. R. China

<sup>Ⓐ</sup> Key Laboratory of Neutron Physics, Institute of Nuclear Physics and Chemistry, China Academy of Engineering Physics, Mianyang 621999, P. R. China

\* Correspondence authors

E-mail: yuxue\_mei@126.com (Y. Mei)

E-mail: wangcao@sdut.edu.cn (C. Wang)

Table S1. Magnetic structure refinement with different canting models on the basis of C-type AFM state. The first column gives a brief description of the direction of the ordered  $\text{Mn}^{2+}$  moment. For example, “AF-a” means the moments only have in-plane components (lie in the ab plane), and the coupling between the nearest neighbor (in-plane) is antiferromagnetic. “AF-c” means the moments are parallel to the c-axis, and the coupling between the nearest neighbors (in-plane) is antiferromagnetic. “AF-a, F-c” represents a canted magnetic state. While the in-plane components of the moments between the nearest neighbors are antiferromagnetic, the components along the c-axis are ferromagnetically coupled with the nearest neighbors.

| ThMnPN<br>@300K  | $R_p$    | $R_{wp}$ | $R_{exp}$ | $\chi^2$ | Magnetic moment<br>( $\mu_B$ ) |
|------------------|----------|----------|-----------|----------|--------------------------------|
| AF-a             | 5.66     | 7.42     | 6.64      | 1.25     | 3.18(13)                       |
| AF-c             | 5.52     | 7.22     | 6.65      | 1.18     | 2.69(9)                        |
| AF-a, c          | unstable |          |           |          |                                |
| AF-a, F-c        | 5.63     | 7.39     | 6.64      | 1.24     | 3.18(13)/1.61(36)              |
| F-a, AF-c        | 5.52     | 7.21     | 6.64      | 1.18     | 0.62(60)/2.70(9)               |
| ThMnPN<br>@4K    | $R_p$    | $R_{wp}$ | $R_{exp}$ | $\chi^2$ | Magnetic moment<br>( $\mu_B$ ) |
| AF-a             | 6.16     | 8.09     | 6.52      | 1.54     | 4.16(15)                       |
| AF-c             | 5.85     | 7.57     | 6.52      | 1.35     | 3.60(10)                       |
| AF-a, c          | unstable |          |           |          |                                |
| AF-a, F-c        | 6.09     | 8.00     | 6.52      | 1.51     | 4.20(15)/2.29(33)              |
| F-a, AF-c        | 5.85     | 7.57     | 6.52      | 1.35     | 0.72(68)/3.61(10)              |
| ThMnAsN<br>@300K | $R_p$    | $R_{wp}$ | $R_{exp}$ | $\chi^2$ | Magnetic moment<br>( $\mu_B$ ) |
| AF-a             | 4.76     | 6.15     | 6.69      | 0.845    | 2.82(14)                       |
| AF-c             | 4.77     | 6.15     | 6.69      | 0.845    | 2.30(11)                       |
| AF-a, c          | unstable |          |           |          |                                |
| AF-a, F-c        | 4.77     | 6.15     | 6.68      | 0.845    | 2.83(14)/0.48(88)              |
| F-a, AF-c        | 4.77     | 6.15     | 6.68      | 0.845    | 0.05(-)/2.30(11)               |
| ThMnAsN<br>@4K   | $R_p$    | $R_{wp}$ | $R_{exp}$ | $\chi^2$ | Magnetic moment<br>( $\mu_B$ ) |
| AF-a             | 4.56     | 5.96     | 6.41      | 0.865    | 4.32(13)                       |
| AF-c             | 4.34     | 5.60     | 6.41      | 0.761    | 3.41(8)                        |
| AF-a, c          | unstable |          |           |          |                                |
| AF-a, F-c        | 4.54     | 5.95     | 6.41      | 0.860    | 4.35(13)/1.53(46)              |
| F-a, AF-c        | unstable |          |           |          |                                |
